# Supplementary material
Source: Springer Nature journal article supplement (https://www.springermedizin.de/resource/supplementary/13023_2011_387_MOESM1_ESM.pdf/9642234)

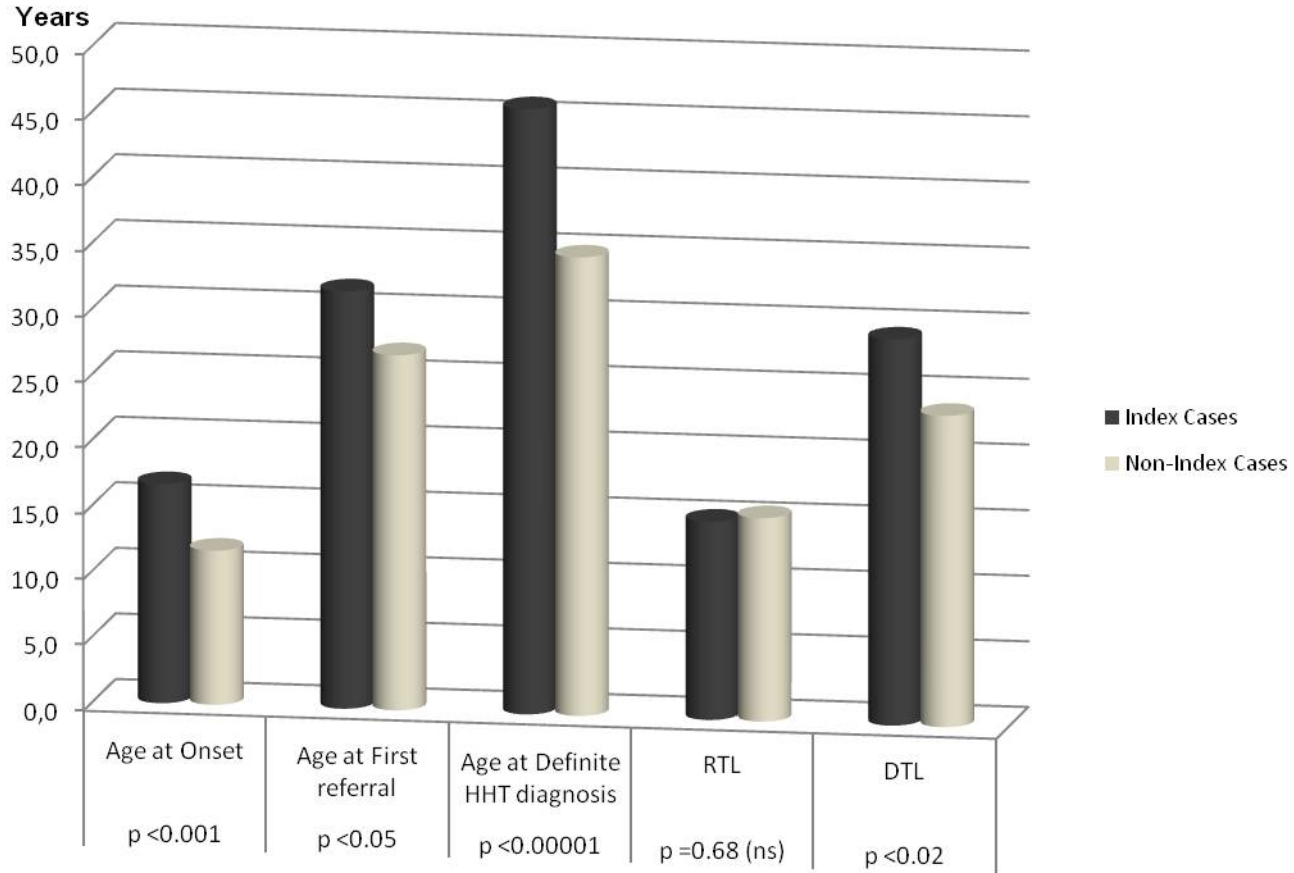

Supplement: MOESM1 [file 9642234]
